# Supplementary material for: Complex effects of kinase localization revealed by compartment-specific regulation of protein kinase A activity
Source: eLife. 2022 Feb 24;11:e66869. doi: 10.7554/eLife.66869 (PMC8871369; doi:10.7554/eLife.66869)
Supplement: Figure 1—figure supplement 1—source data 2. — One-way ANOVAs with multiple comparisons for PKAR-IIb (Sheet 1), PKAR-IIa (Sheet 2), PKA-RI (Sheet 3), and PKA-C (Sheet 4) expression data presented in Figure 1—figure supplement 1. Mean, standard deviation, and number of technical replicates also shown for each condition. [file elife-66869-fig1-figsupp1-data2.xlsx]

## Sheet: PKA RIIb
PFY trans			PFM trans			PFY stable			PFM stable			HeLa
Mean	SD	N	Mean	SD	N	Mean	SD	N	Mean	SD	N	Mean	SD	N
2.59765	1.23628	2	1.39388	0.400566	2	5.74867	1.56469	2	6.09675	0.280836	2	1	0	2
ANOVA summary
F	13.76
P value	0.0066	**
R squared	0.9167
Multiple comparisons
Number of families	1
Number of comparisons per family	10
Alpha	0.05
Tukey's multiple comparisons test	Mean Diff.	95.00% CI of diff.	Below threshold?	Summary	Adjusted P Value
PFY trans vs. PFM trans	1.204	-2.480 to 4.887	No	ns	0.698
PFY trans vs. PFY stable	-3.151	-6.835 to 0.5326	No	ns	0.0875
PFY trans vs. PFM stable	-3.499	-7.183 to 0.1845	No	ns	0.0604
PFY trans vs. HeLa	1.598	-2.086 to 5.281	No	ns	0.488
PFM trans vs. PFY stable	-4.355	-8.038 to -0.6712	Yes	*	0.026
PFM trans vs. PFM stable	-4.703	-8.386 to -1.019	Yes	*	0.019
PFM trans vs. HeLa	0.3939	-3.290 to 4.077	No	ns	0.9908
PFY stable vs. PFM stable	-0.3481	-4.032 to 3.335	No	ns	0.9942
PFY stable vs. HeLa	4.749	1.065 to 8.432	Yes	*	0.0182
PFM stable vs. HeLa	5.097	1.413 to 8.780	Yes	*	0.0135
Test details	Mean 1	Mean 2	Mean Diff.	SE of diff.	n1	n2	q	DF
PFY trans vs. PFM trans	2.598	1.394	1.204	0.9183	2	2	1.854	5
PFY trans vs. PFY stable	2.598	5.749	-3.151	0.9183	2	2	4.853	5
PFY trans vs. PFM stable	2.598	6.097	-3.499	0.9183	2	2	5.389	5
PFY trans vs. HeLa	2.598	1	1.598	0.9183	2	2	2.461	5
PFM trans vs. PFY stable	1.394	5.749	-4.355	0.9183	2	2	6.707	5
PFM trans vs. PFM stable	1.394	6.097	-4.703	0.9183	2	2	7.243	5
PFM trans vs. HeLa	1.394	1	0.3939	0.9183	2	2	0.6066	5
PFY stable vs. PFM stable	5.749	6.097	-0.3481	0.9183	2	2	0.5361	5
PFY stable vs. HeLa	5.749	1	4.749	0.9183	2	2	7.313	5
PFM stable vs. HeLa	6.097	1	5.097	0.9183	2	2	7.85	5

## Sheet: PKAR IIa
PFY trans			PFM trans			PFY stable			PFM stable			HeLa
Mean	SD	N	Mean	SD	N	Mean	SD	N	Mean	SD	N	Mean	SD	N
0.896729	0.029613	2	0.757391	0.115822	2	0.867072	0.032149	2	0.798475	0.009938	2	1	0	2
ANOVA summary
F	5.711
P value	0.0417	*
R squared	0.8204
Multiple comparisons
Number of families	1
Number of comparisons per family	10
Alpha	0.05
Tukey's multiple comparisons test	Mean Diff.	95.00% CI of diff.	Below threshold?	Summary	Adjusted P Value
PFY trans vs. PFM trans	0.1393	-0.08346 to 0.3621	No	ns	0.2257
PFY trans vs. PFY stable	0.02966	-0.1931 to 0.2525	No	ns	0.9795
PFY trans vs. PFM stable	0.09825	-0.1245 to 0.3211	No	ns	0.4749
PFY trans vs. HeLa	-0.1033	-0.3261 to 0.1195	No	ns	0.436
PFM trans vs. PFY stable	-0.1097	-0.3325 to 0.1131	No	ns	0.3896
PFM trans vs. PFM stable	-0.04108	-0.2639 to 0.1817	No	ns	0.9377
PFM trans vs. HeLa	-0.2426	-0.4654 to -0.01981	Yes	*	0.0361
PFY stable vs. PFM stable	0.0686	-0.1542 to 0.2914	No	ns	0.7361
PFY stable vs. HeLa	-0.1329	-0.3557 to 0.08987	No	ns	0.2544
PFM stable vs. HeLa	-0.2015	-0.4243 to 0.02128	No	ns	0.0721
Test details	Mean 1	Mean 2	Mean Diff.	SE of diff.	n1	n2	q	DF
PFY trans vs. PFM trans	0.8967	0.7574	0.1393	0.05554	2	2	3.548	5
PFY trans vs. PFY stable	0.8967	0.8671	0.02966	0.05554	2	2	0.7551	5
PFY trans vs. PFM stable	0.8967	0.7985	0.09825	0.05554	2	2	2.502	5
PFY trans vs. HeLa	0.8967	1	-0.1033	0.05554	2	2	2.63	5
PFM trans vs. PFY stable	0.7574	0.8671	-0.1097	0.05554	2	2	2.793	5
PFM trans vs. PFM stable	0.7574	0.7985	-0.04108	0.05554	2	2	1.046	5
PFM trans vs. HeLa	0.7574	1	-0.2426	0.05554	2	2	6.177	5
PFY stable vs. PFM stable	0.8671	0.7985	0.0686	0.05554	2	2	1.747	5
PFY stable vs. HeLa	0.8671	1	-0.1329	0.05554	2	2	3.385	5
PFM stable vs. HeLa	0.7985	1	-0.2015	0.05554	2	2	5.131	5

## Sheet: PKA RI
PFY trans			PFM trans			PFY stable			PFM stable			HeLa
Mean	SD	N	Mean	SD	N	Mean	SD	N	Mean	SD	N	Mean	SD	N
1.3314	0.227072	2	1.43163	0.827097	2	0.695057	0.188731	2	0.813472	0.264456	2	1	0	2
ANOVA summary
F	1.216
P value	0.4084	n.s.
R squared	0.4931

## Sheet: PKA C
PFY trans			PFM trans			PFY stable			PFM stable			HeLa
Mean	SD	N	Mean	SD	N	Mean	SD	N	Mean	SD	N	Mean	SD	N
1.02403	0.44477	2	1.03402	0.108903	2	1.17355	0.414738	2	1.26374	0.195368	2	1	0	2
ANOVA summary
F	0.3117
P value	0.8592	n.s.
R squared	0.1996
