# Supplementary material for: Complex effects of kinase localization revealed by compartment-specific regulation of protein kinase A activity
Source: eLife. 2022 Feb 24;11:e66869. doi: 10.7554/eLife.66869 (PMC8871369; doi:10.7554/eLife.66869)
Supplement: Figure 1—source data 1. — (a) Sheet 1, Figure 1D Time Course. Change in mCherry cytoplasmic intensity following addition of 0.1% DMSO or 100 nM rapamycin. Mean, standard error of the mean (SEM), and number of cells given for each time point and condition. (b) Sheet 2, Figure 1E Time Course. Change in mCherry cytoplasmic intensity following addition of 100 nM rapamycin. Mean, SEM, and number of cells given for each time point and condition. [file elife-66869-fig1-data1.xlsx]

## Sheet: Fig 1D
	0.1% DMSO			100 nM rapamycin
Time (min)	Mean	SEM	N	Mean	SEM	N
-4	1.01203	0.00665606	5	1.04065	0.00276427	4
-2	1.01052	0.00826502	5	1.00856	0.00832075	4
0	1	0	5	1	0	4
2	1.01054	0.0100454	5	0.893873	0.00695714	4
4	1.01459	0.011145	5	0.876287	0.0146016	4
6	1.0196	0.0136109	5	0.874916	0.0158496	4
8	1.03307	0.0259572	5	0.876174	0.0192935	4
10	1.02273	0.0205897	5	0.899424	0.0128004	4
12	1.04279	0.0215388	5	0.892278	0.0168502	4
14	1.03961	0.0208742	5	0.878425	0.0164209	4
16	1.04695	0.0162181	5	0.890998	0.020427	4
18	1.06948	0.0226031	5	0.886031	0.0199048	4
20	1.09096	0.0277223	5	0.901074	0.0158693	4
22	1.10592	0.0302185	5	0.901487	0.0196061	4
24	1.0839	0.03168	5	0.893294	0.030882	4

## Sheet: Fig 1E
	mCherry control			mCherry-PKA-C
Time (min)	Mean	SEM	N	Mean	SEM	N
-4	1.02196	0.00669019	12	1.0169	0.00446843	24
-2	1.00137	0.00978199	12	1.00038	0.00439855	24
0	1	0	12	1	0	24
2	0.972537	0.0119427	12	0.919543	0.010938	24
4	0.969596	0.0143199	12	0.90664	0.014872	24
6	0.961524	0.01848	12	0.900214	0.0160387	24
8	0.966591	0.023956	12	0.892439	0.0179456	24
10	0.97035	0.0243235	12	0.87454	0.0245666	24
12	0.973812	0.0274075	12	0.86851	0.0288673	24
14	0.977719	0.0304889	12	0.87355	0.0294364	24
16	0.979731	0.0288019	12	0.863295	0.0311045	24
18	0.965821	0.0297049	12	0.861082	0.0336449	24
20	0.973914	0.032619	12	0.85042	0.0360757	24
22	0.98154	0.0366597	12	0.852467	0.0355608	24
24	0.988815	0.0426553	12	0.856923	0.0371303	24
