# Supplementary material for: Complex effects of kinase localization revealed by compartment-specific regulation of protein kinase A activity
Source: eLife. 2022 Feb 24;11:e66869. doi: 10.7554/eLife.66869 (PMC8871369; doi:10.7554/eLife.66869)
Supplement: Figure 2—source data 1. — (a) Sheet 1, Figure 2A Time Course. Lyn-AKAR4 response following addition of 0.1% DMSO or 100 nM rapamycin. Mean, standard error of the mean (SEM), and number of cells given for each time point and condition. (b) Sheet 2, Single cell data. Single cell time courses from Figure 2A–E. Cells are labeled as having low or high PKA-R expression. (c) Sheet 3, Figure 2E Time Course. Lyn-AKAR4 response following addition of 100 nM rapamycin for cells with low vs. high PKA-R expression. Mean, SEM, and number of cells given for each time point and condition. (d) Sheet 4, Figure 2F Time Course. Lyn-AKAR4 response following addition of 2 or 20 nM rapamycin. Mean, SEM, and number of cells given for each time point and condition. [file elife-66869-fig2-data1.xlsx]

## Sheet: Fig 2A timecourse
	0.1% DMSO			100 nM rapamycin
Time (min)	Mean	SEM	N	Mean	SEM	N
-4	0.997121	0.00179598	48	1.00112	0.00137374	44
-2	0.997924	0.00118191	48	1.00197	0.00139684	44
0	1	0	48	1	0	44
2	0.997847	0.00132311	48	1.0269	0.00343468	44
4	0.998202	0.00270924	48	1.04187	0.00462565	44
6	0.996682	0.00171372	48	1.03777	0.00479194	44
8	0.995656	0.00204029	48	1.0326	0.00426479	44
10	0.99558	0.00189989	48	1.02589	0.00446229	44
12	0.999564	0.00210521	48	1.02177	0.00427251	44
14	0.998244	0.00225908	48	1.01829	0.00430692	44
16	0.997909	0.00238498	48	1.01899	0.00467584	44
18	0.997199	0.00263607	48	1.01585	0.00459966	44
20	0.996671	0.00262505	48	1.01316	0.00453159	44
22	0.998047	0.00238062	48	1.01095	0.00436618	44
24	0.997118	0.00250533	48	1.00818	0.00453439	44
26	0.996475	0.00284211	48	1.00753	0.00456009	44
28	0.996736	0.00306571	48	1.00585	0.00470126	44
30	0.996055	0.0031368	48	1.00359	0.0048398	44
32	0.99863	0.00346666	48	1.00219	0.00472632	44
34	0.996482	0.00319028	48	1.00219	0.00476323	44
36	0.994108	0.00334546	48	1.00053	0.00472474	44
38	0.996811	0.00363005	48	0.999766	0.00493829	44
40	0.995059	0.00337835	48	0.997605	0.00511211	44
42	0.994027	0.00364255	48	0.998528	0.00511493	44
44	0.995044	0.00422739	48	0.997247	0.00514803	44
46	0.99081	0.00385157	48	0.997395	0.00523502	44
48	0.989744	0.00416038	48	0.997532	0.00530542	44
50	0.991423	0.00408552	48	0.994985	0.00529731	44
52	0.989911	0.00433174	48	0.993619	0.00548869	44
54	0.99091	0.00434984	48	0.992787	0.00567988	44
56	0.989541	0.00407005	48	0.990941	0.00560043	44
58	0.990577	0.00431971	48	0.992696	0.00569268	44
60	0.988589	0.00442255	48	0.991277	0.00578462	44
62	0.989141	0.00477723	48	0.991133	0.00611265	44

## Sheet: SS data
Cell #	1	2	3	4	5	6	7	8	9	10	11	12	13	14	15	16	17	18	19	20	21	22	23	24	25	26	27	28	29	30	31	32	33	34	35	36	37	38	39	40	41	42	43	44
mCherry intensity (a.u.)	11.1384	16.6839	20.0132	32.4348	41.4044	41.5943	42.5144	42.7672	43.4223	45.0891	51.0236	51.5936	53.227	53.8936	56.068	59.0939	63.8367	64.4163	69.1278	77.113	80.0422	89.2345	90.9364	91.5138	93.1668	100.084	104.392	106.237	108.245	119.983	133.572	136.414	139.476	147.428	152.1	168.847	175.484	184.297	206.998	208.021	221.113	250.798	285.121	289.477
	LOW	LOW	LOW	LOW	LOW	LOW	LOW	LOW	LOW	LOW	LOW	LOW	LOW	LOW	LOW	LOW	LOW	LOW	LOW	LOW	LOW	LOW	LOW	LOW	LOW	LOW	LOW	LOW	LOW	LOW	LOW	LOW	LOW	LOW	HIGH	HIGH	HIGH	HIGH	HIGH	HIGH	HIGH	HIGH	HIGH	HIGH
Time (min)
-4	1.00226	1.00515	0.986365	1.01422	0.992419	0.995317	0.99497	0.994729	1.00777	0.997597	0.984659	1.00082	1.01377	1.0085	0.998039	1.01777	1.00781	0.994805	1.00748	1.00496	1.01235	0.996894	1.00528	1.00413	1.00168	0.984797	1.00507	1.00872	0.992311	0.987119	1.03022	1.00432	1.0057	0.997072	0.999884	0.999303	1.0024	0.996313	0.994445	1.00649	1.00072	0.986989	1.00173	0.996109
-2	1.0073	1.00918	0.959989	1.01178	1.00515	1.003	1.00799	0.988279	1.00121	1.00079	1.00791	1.00401	1.01538	1.00695	0.994653	0.999353	1.00348	1.00054	1.00786	0.998355	1.01125	0.999698	1.00319	0.993649	1.00035	1.01217	1.00918	1.00477	0.987614	1.00203	1.01839	1.00477	1.00067	0.999792	1.00292	1.00404	0.999677	0.995989	0.993407	1.00289	1.00908	0.996612	0.992476	1.00909
0	1	1	1	1	1	1	1	1	1	1	1	1	1	1	1	1	1	1	1	1	1	1	1	1	1	1	1	1	1	1	1	1	1	1	1	1	1	1	1	1	1	1	1	1
2	1.00411	1.02425	1.00211	1.01507	1.02394	1.02105	1.0342	0.990601	1.05743	1.07028	1.04094	1.02627	1.03539	1.03961	1.0082	1.04423	1.0084	0.994903	1.00833	1.03895	1.02937	1.03186	1.03598	1.04091	1.09123	1.04039	1.04881	1.05535	1.04732	1.0506	1.06176	1.01942	1.02129	0.998467	1.01061	1.04516	1.03159	0.9876	1.00259	1.00607	1.02686	1.01194	0.998992	1.00097
4	1.01263	1.02976	1.02164	1.06692	1.0436	1.03779	1.02726	0.990359	1.0819	1.10337	1.06263	1.01068	1.03762	1.04186	1.03344	1.1079	1.01317	1.00912	1.03734	1.06193	1.04367	1.02523	1.03784	1.05599	1.12145	1.03434	1.07013	1.04797	1.04206	1.06148	1.06768	1.01568	1.03289	1.09928	1.01609	1.06744	1.05629	0.981334	1.05217	1.01683	1.02497	1.03203	1.00842	1.00014
6	1.00705	1.03687	0.994412	1.0706	1.03226	1.02326	1.01977	0.99933	1.05782	1.09714	1.04786	1.02509	1.02471	1.03996	1.04492	1.12545	1.01808	1.00731	1.0268	1.05698	1.04729	1.01739	1.05052	1.03376	1.10885	1.03427	1.05112	1.04854	1.02381	1.03729	1.06723	0.998107	1.02972	1.09295	1.00754	1.07641	1.06057	0.966561	1.06693	1.02419	1.01856	1.03817	1.00627	1.00025
8	0.997593	1.02944	0.995084	1.06061	1.01977	1.02135	1.02556	1.01652	1.05275	1.08711	1.0428	1.0069	0.992578	1.0265	1.05071	1.10702	1.03053	1.00857	1.01909	1.05767	1.03673	1.01738	1.05888	1.01782	1.09221	1.03737	1.03659	1.03306	1.04544	1.02711	1.06	0.9971	1.02207	1.08119	1.00846	1.0591	1.04723	0.980261	1.05819	1.02047	1.01124	1.04146	0.999736	0.99706
10	0.98808	1.02434	0.980396	1.0503	1.01018	1.01374	1.00823	0.990164	1.04559	1.08208	1.02733	1.03366	1.01051	1.01184	1.06406	1.111	1.0152	1.00832	1.01657	1.04996	1.0297	1.00551	1.04199	1.03619	1.08108	1.01431	1.02787	1.03522	1.04944	1.00953	1.05243	0.993961	1.0036	1.06977	0.992416	1.04924	1.04254	0.965909	1.05263	1.02607	0.998998	1.02628	0.998903	0.993967
12	0.987713	1.01273	0.975661	1.04459	1.00428	1.01462	1.02949	0.981867	1.02733	1.0726	1.02188	1.01222	1.00368	1.00767	1.05553	1.1047	1.01073	1.01074	1.0175	1.04033	1.02931	1.00191	1.03695	1.01916	1.07577	1.0072	1.01285	1.02858	1.06882	1.01578	1.05134	0.987036	1.01722	1.05968	0.99291	1.04291	1.03065	0.980753	1.04988	1.02892	0.995487	1.01491	0.986045	0.987758
14	1.00052	1.01979	0.996343	1.04389	0.996904	1.00972	1.00202	1.01222	1.0161	1.07284	1.02183	1.01538	1.00233	0.991993	1.05362	1.11233	0.99666	1.00851	1.01681	1.02986	1.02674	1.00156	1.03434	1.01858	1.08356	1.00348	0.998216	1.02559	1.04565	1.00522	1.05492	0.992095	1.01076	1.04702	0.972776	1.03078	1.03074	0.961162	1.04426	1.01112	0.992487	1.01463	0.989484	0.989774
16	0.994887	1.01677	0.988728	1.03626	0.997937	1.00908	1.00881	1.00442	1.01286	1.09303	1.02022	1.02804	1.03153	0.986981	1.06115	1.10838	1.00058	1.01338	1.01163	1.01541	1.01731	0.99641	1.01602	1.02557	1.09055	1.00268	0.992808	1.03285	1.08334	1.0009	1.05264	0.991676	1.01609	1.03862	0.974896	1.02556	1.02374	0.963649	1.0461	1.01517	0.98618	1.00927	0.987795	1.00557
18	0.987873	1.01643	1.00021	1.02681	0.989656	1.02095	1.00484	0.996916	1.01022	1.09315	1.02365	1.02511	1.00885	0.988549	1.05471	1.10469	1.0001	1.01347	1.00727	1.01645	1.0163	0.997503	1.01902	1.03432	1.09231	0.992782	0.985434	1.03211	1.06386	0.994479	1.04083	0.98982	1.00561	1.02974	0.975932	1.02726	1.01567	0.959546	1.04696	1.01306	0.984167	1.01294	0.983173	0.994796
20	0.982217	1.01157	0.997393	1.02997	1.02497	1.01396	1.0176	0.979281	1.00591	1.08668	1.01586	1.02023	0.9898	0.982512	1.04223	1.09842	1.0036	1.01212	0.998364	1.02186	1.02416	0.99851	1.01181	1.03423	1.08245	1.00351	0.977952	1.03369	1.05336	1.00257	1.04358	0.984	1.00264	1.02181	0.968231	1.01571	1.00906	0.959894	1.05331	1.01209	0.987427	1.00515	0.985648	0.973758
22	0.984561	1.01392	0.998351	1.02138	0.994454	1.01992	1.00246	0.984944	0.997678	1.08276	0.99847	1.01087	1.00286	0.979841	1.04702	1.09315	0.985734	1.01066	0.997255	1.01525	1.02215	1.00122	1.01044	1.03542	1.09169	1.00431	0.973709	1.03431	1.0308	0.990301	1.03287	0.98087	1.00932	1.01823	0.969347	1.01381	1.01038	0.97123	1.05418	1.01854	0.987952	1.00462	0.981683	0.992837
24	0.988517	1.01132	0.980633	1.0252	0.999201	1.01528	1.0202	0.98277	0.998294	1.07401	1.01764	1.03871	0.968992	0.971076	1.04537	1.0902	0.990699	1.01378	0.995507	1.00636	1.01196	0.993439	1.00676	1.03136	1.08263	0.982871	0.965334	1.03634	1.02193	0.983132	1.03264	0.977234	0.998239	1.0142	0.961345	1.01988	1.00876	0.960169	1.04815	1.01916	0.985039	1.00177	0.991245	0.992351
26	0.977202	1.02244	0.983823	1.02125	0.994153	1.02222	1.00823	0.993069	0.992283	1.07051	1.00932	1.00801	0.975258	0.974544	1.04787	1.10189	0.992971	1.01342	0.998904	1.01033	1.00888	0.992874	0.997485	1.01629	1.08341	0.987784	0.966359	1.02375	1.04085	1.00611	1.03687	0.982478	0.995539	1.00795	0.962097	1.01042	1.01012	0.957813	1.0503	1.01471	0.986404	0.993622	0.971091	1.0106
28	0.983489	1.01819	0.980677	1.01442	0.984235	1.02921	0.994568	0.982354	0.98906	1.06553	1.01719	1.02564	0.961567	0.976606	1.0378	1.11036	1.00986	1.00941	0.995619	1.00919	1.00885	0.994673	1.02918	1.01823	1.08706	0.984834	0.968251	1.01596	1.02263	0.988076	1.0351	0.979579	0.979499	1.00302	0.960678	1.00235	1.00277	0.966786	1.05353	1.00383	0.98361	0.998182	0.977813	0.997967
30	0.976732	1.01748	0.973633	1.01854	1.01098	1.03176	1.01954	0.964831	0.983828	1.07272	1.00139	1.02353	0.962189	0.975419	1.03652	1.10709	0.99069	1.00939	0.995244	1.01591	1.00987	0.991353	1.00449	0.993738	1.0789	0.977217	0.970467	1.02776	1.02878	0.972332	1.0348	0.979404	0.974172	1.00539	0.962663	1.002	1.00785	0.957115	1.04459	1.0062	0.987462	0.991967	0.985897	0.976139
32	0.973102	1.01858	0.955773	0.999811	1.00047	1.01966	1.00491	1.01426	0.987776	1.06004	1.00182	1.0158	0.971812	0.969798	1.03914	1.11319	0.996709	1.00774	0.994667	1.00964	1.00691	0.991328	1.00662	1.01653	1.07321	0.967799	0.96251	1.02186	1.01495	0.973503	1.03212	0.981038	0.965913	0.996331	0.960575	1.00682	1.0045	0.954529	1.04457	1.00462	0.983826	0.987671	0.983727	1.0002
34	0.984509	1.00757	0.983955	1.01603	0.990476	1.02159	1.03196	0.992228	0.980247	1.0595	1.01448	1.0231	0.967252	0.973957	1.04279	1.11423	0.99538	1.01726	0.990508	1.0128	1.0022	0.992242	1.01051	1.01278	1.06756	0.974995	0.959503	1.0133	1.02445	0.979959	1.0232	0.978846	0.951298	0.988959	0.951361	0.997665	1.00733	0.955513	1.03537	1.01157	0.987099	0.991418	0.971558	0.987849
36	0.975232	1.01588	0.993436	1.01214	0.996386	1.02889	1.01572	0.973816	0.982088	1.05945	1.0044	1.01017	0.96759	0.966903	1.04044	1.10641	0.979033	1.01124	0.992958	1.00204	0.999193	0.990423	1.00642	1.00722	1.07368	0.972045	0.956867	1.01167	1.0228	0.999533	1.02553	0.978643	0.956658	0.997307	0.954263	0.998663	1.00188	0.946413	1.03907	1.01316	0.981246	0.988263	0.975769	0.992371
38	0.98067	1.01583	0.984432	1.01638	0.981632	1.02299	0.993613	0.984081	0.980818	1.06115	1.00241	1.02602	0.966044	0.975956	1.04471	1.11103	0.980149	1.01545	0.99156	0.994644	1.00352	0.992953	1.00173	0.984095	1.07145	0.959297	0.967466	1.00805	1.03801	1.01095	1.03758	0.974305	0.949755	0.98978	0.956528	0.995548	0.997134	0.951988	1.03597	1.01873	0.982139	0.985427	0.977739	0.969974
40	0.975064	1.01555	0.983662	1.01748	0.982274	1.02829	0.993515	0.993146	0.97327	1.07066	0.990746	1.00439	0.936509	0.968034	1.04396	1.11343	0.991919	1.02204	0.993451	1.00193	1.00345	0.994709	1.01137	0.993944	1.06578	0.964307	0.965594	1.00114	1.00891	1.00786	1.03147	0.976938	0.935577	0.986795	0.9545	0.992044	0.996025	0.946813	1.03307	1.00586	0.979878	0.986701	0.976784	0.97576
42	0.978556	1.01472	1.00072	1.01789	0.98069	1.02975	1.01231	0.992332	0.976937	1.07419	0.986875	0.999254	0.955407	0.972526	1.04589	1.11781	0.974286	1.02128	0.993676	1.00381	0.99977	0.990868	1.00418	1.00784	1.06137	0.968531	0.958035	1.00337	1.02619	0.998926	1.03159	0.977667	0.938628	0.989251	0.95473	0.992148	0.993044	0.946713	1.02928	1.00749	0.982566	0.983979	0.970742	0.969412
44	0.974949	1.01645	0.994395	1.01218	0.981906	1.02612	0.991407	0.989795	0.975587	1.07899	0.984858	1.00407	0.958244	0.970104	1.05301	1.11827	0.97144	1.01548	1.00187	1.00204	1.00003	0.989784	0.992485	0.985585	1.0611	0.963806	0.952953	1.01001	1.02203	0.99518	1.03267	0.977339	0.941813	0.99157	0.945978	0.985916	1.00266	0.960452	1.0275	1.00546	0.979209	0.976835	0.977283	0.980018
46	0.9597	1.01373	0.984605	1.01511	0.993135	1.02348	1.00512	0.983949	0.973372	1.08464	0.981282	1.02106	0.943985	0.975823	1.05391	1.1129	0.986811	1.01566	0.997507	0.989586	0.999163	0.999774	1.00529	1.00196	1.05247	0.96779	0.954156	1.00814	1.01966	0.988108	1.03537	0.98043	0.936039	0.982573	0.947744	0.986416	1.00151	0.957161	1.03012	1.00535	0.978754	0.975352	0.968822	0.987874
48	0.963838	1.01742	0.997064	1.01093	0.984054	1.02965	1.02137	1.002	0.977747	1.07736	0.986474	1.02272	0.931462	0.975772	1.05823	1.10067	0.964529	1.01804	1.00071	0.991458	0.994912	0.995034	0.990624	1.00483	1.05306	0.970699	0.953334	1.00931	1.03589	1.00991	1.0316	0.978158	0.934009	0.985884	0.952515	0.990928	0.999462	0.940815	1.02119	1.00836	0.977395	0.971624	0.967467	0.982877
50	0.96392	1.01964	0.961635	1.00532	0.987611	1.02866	1.01916	0.987337	0.972998	1.07446	0.978521	1.0075	0.929835	0.978702	1.05241	1.1147	0.975887	1.01709	1.00132	0.982028	0.990265	0.989661	1.00543	0.989933	1.04361	0.966125	0.960657	1.00241	1.03901	1.00544	1.02873	0.975309	0.936851	0.984811	0.957585	0.985237	1.00323	0.960969	1.01617	1.0049	0.97002	0.970292	0.954719	0.979232
52	0.956274	1.0194	0.999758	1.02185	0.99768	1.03266	0.995425	0.983477	0.972138	1.08348	0.983672	1.01364	0.922357	0.975967	1.05116	1.10648	0.964128	1.01839	0.998925	0.979526	0.990556	0.996487	0.996278	0.982606	1.04345	0.954833	0.954445	1.00418	1.01378	0.991597	1.03961	0.97824	0.930686	0.984467	0.952937	0.988025	1.00131	0.94424	1.0206	1.00318	0.966331	0.971974	0.966752	0.966284
54	0.952753	1.01838	0.988179	1.02138	0.98043	1.02541	1.0085	0.977107	0.968638	1.07977	0.978606	1.03243	0.908875	0.974573	1.04826	1.11244	0.967962	1.02233	0.99907	0.980234	0.989747	0.991304	0.993329	0.981228	1.04437	0.962295	0.950399	1.00892	1.0065	0.991582	1.05113	0.977904	0.930521	0.984709	0.947284	0.986443	0.99479	0.956043	1.01531	0.996289	0.968181	0.965487	0.965157	0.97839
56	0.951623	1.01727	0.967509	1.01936	0.983121	1.02445	1.02728	0.985801	0.968314	1.08105	0.970084	0.99196	0.915243	0.981512	1.05057	1.10297	0.964246	1.023	1.00187	0.975835	0.98495	0.997777	1.00008	0.976699	1.03867	0.952625	0.947511	1.01288	1.00735	0.983049	1.04452	0.977622	0.925134	0.98554	0.951413	0.986192	0.996811	0.957885	1.01484	0.994822	0.965687	0.969656	0.963476	0.963192
58	0.955924	1.01693	0.975673	1.02367	0.979987	1.02744	1.01606	0.993182	0.963448	1.08092	0.976369	1.01413	0.931859	0.97585	1.04943	1.1107	0.970332	1.02397	1.00733	0.969876	0.985127	0.991574	1.00754	0.991925	1.03921	0.949413	0.946368	1.0113	1.0351	0.978896	1.04268	0.976697	0.922842	0.985045	0.948098	0.985349	1.00117	0.951001	1.00815	0.994212	0.96921	0.967055	0.959478	0.968092
60	0.958212	1.01928	0.97685	1.01985	0.999184	1.02906	0.984066	0.994873	0.962881	1.08191	0.979431	0.989362	0.893338	0.981918	1.04895	1.10442	0.971388	1.02759	1.00539	0.966358	0.982773	0.989572	1.01248	0.985833	1.03432	0.963259	0.950163	1.01671	1.01728	0.976521	1.04859	0.977013	0.916916	0.98371	0.946509	0.979829	0.999813	0.95604	1.00842	0.996443	0.968467	0.969341	0.959753	0.982141
62	0.943725	1.02108	0.952181	1.02371	0.983556	1.01989	0.996631	1.00805	0.962486	1.07836	0.977145	1.03841	0.918206	0.976346	1.05393	1.11734	0.957638	1.02379	1.00425	0.961456	0.98854	0.993091	1.00358	0.968901	1.03601	0.955437	0.948846	1.01433	1.03033	0.968023	1.05128	0.97579	0.921268	0.9859	0.95054	0.980528	1.00532	0.953527	1.01199	0.99716	0.966872	0.961956	0.9548	0.967687
Max PKA activity (a.u.)	1.01263	1.03687	1.02164	1.0706	1.0436	1.03779	1.0342	1.01652	1.0819	1.10337	1.06263	1.03871	1.03762	1.04186	1.06406	1.12545	1.03053	1.02759	1.03734	1.06193	1.04729	1.03186	1.05888	1.05599	1.12145	1.04039	1.07013	1.05535	1.08334	1.06148	1.06768	1.01942	1.03289	1.09928	1.01609	1.07641	1.06057	1	1.06693	1.02892	1.02686	1.04146	1.00842	1.0106

## Sheet: Fig 2E timecourse
	Low [PKAR]			High [PKAR]
Time (min)	Mean	SEM	N	Mean	SEM	N
-4	1.00191	0.00169429	34	0.998438	0.00168769	10
-2	1.00237	0.00172679	34	1.00062	0.00189219	10
0	1	0	34	1	0	10
2	1.03121	0.00387235	34	1.01224	0.00549295	10
4	1.04666	0.00521667	34	1.02557	0.00850512	10
6	1.04107	0.00527948	34	1.02655	0.0108223	10
8	1.03562	0.0048308	34	1.02232	0.00873157	10
10	1.02918	0.00504693	34	1.0147	0.00911235	10
12	1.02493	0.00491874	34	1.01102	0.00809515	10
14	1.02257	0.0047933	34	1.00372	0.0085447	10
16	1.02346	0.00538539	34	1.00379	0.00805332	10
18	1.02012	0.00525773	34	1.00135	0.00836031	10
20	1.01791	0.00504518	34	0.997027	0.00877185	10
22	1.01403	0.00506178	34	1.00046	0.0080944	10
24	1.01094	0.00527112	34	0.998788	0.00855444	10
26	1.01071	0.00522139	34	0.996718	0.00896907	10
28	1.00912	0.00551991	34	0.994752	0.00818929	10
30	1.00694	0.00573712	34	0.992188	0.00796178	10
32	1.00486	0.00560875	34	0.993103	0.00809613	10
34	1.00587	0.00558354	34	0.989675	0.0081103	10
36	1.00389	0.00549917	34	0.98911	0.0085748	10
38	1.00349	0.00581448	34	0.987117	0.00825723	10
40	1.00139	0.00610494	34	0.984744	0.00780815	10
42	1.00309	0.00604534	34	0.983011	0.0077305	10
44	1.0011	0.00619613	34	0.984132	0.0073336	10
46	1.00136	0.00627791	34	0.98391	0.00765752	10
48	1.00232	0.00628451	34	0.981264	0.00782905	10
50	0.999323	0.00640884	34	0.980235	0.00682534	10
52	0.998165	0.00658213	34	0.978163	0.00767131	10
54	0.997332	0.00693938	34	0.977337	0.00659874	10
56	0.995219	0.00686037	34	0.976397	0.00649619	10
58	0.997847	0.00689875	34	0.975181	0.00662033	10
60	0.995572	0.00711717	34	0.976675	0.00642637	10
62	0.995867	0.00747991	34	0.975038	0.00712281	10

## Sheet: Fig 2F timecourse
	2 nM rapamycin			20 nM rapamycin
Time (min)	Mean	SEM	N	Mean	SEM	N
-18	0.967731	0.00638289	22	0.978182	0.00397835	21
-16	0.990584	0.00455797	22	0.998233	0.00388756	21
-14	0.993927	0.0042286	22	0.998294	0.00378212	21
-12	0.994024	0.0038261	22	1.00167	0.00308589	21
-10	0.995774	0.00331311	22	1.00091	0.00301399	21
-8	0.997682	0.00318688	22	1.00118	0.00247069	21
-6	0.999165	0.00233082	22	1.00179	0.00188629	21
-4	1.00006	0.00239517	22	0.998655	0.00197819	21
-2	1.00135	0.00194477	22	1.00039	0.00163484	21
0	1	0	22	1	0	21
2	0.999902	0.00227646	22	1.00848	0.00282935	21
4	1.0056	0.0023226	22	1.02348	0.00376524	21
6	1.01125	0.00260033	22	1.02125	0.00449949	21
8	1.01306	0.0035125	22	1.01849	0.00542861	21
10	1.0173	0.00337818	22	1.01469	0.00557041	21
12	1.02023	0.00527274	22	1.01247	0.00696454	21
14	1.02408	0.00549686	22	1.01309	0.00702162	21
16	1.02574	0.00710772	22	1.00747	0.00728016	21
18	1.02702	0.00699092	22	1.01257	0.011467	21
20	1.0284	0.00752114	22	1.00517	0.00819069	21
22	1.03052	0.0080586	22	1.00396	0.00769255	21
24	1.0335	0.0104022	22	1.00463	0.00846238	21
26	1.03371	0.00962047	22	1.00491	0.00841328	21
28	1.03142	0.00967205	22	1.00687	0.00900325	21
30	1.03145	0.0105394	22	1.00508	0.00999528	21
32	1.03241	0.01136	22	1.00576	0.0103855	21
34	1.03473	0.0117525	22	1.00363	0.0101649	21
36	1.03551	0.0122509	22	1.00522	0.00996755	21
38	1.03872	0.0126806	22	1.00546	0.0105464	21
40	1.04042	0.0143357	22	1.00747	0.0114513	21
42	1.0447	0.0156741	22	1.00735	0.0111109	21
44	1.04994	0.0168265	22	1.0059	0.0119729	21
46	1.04095	0.0137146	22	1.00504	0.0118642	21
48	1.04234	0.0180943	22	1.00426	0.0121346	21
50	1.05573	0.0196236	22	1.00063	0.0128168	21
52	1.04974	0.0186518	22	1.00129	0.0127545	21
54	1.06796	0.0234929	22	1.00305	0.012533	21
56	1.06214	0.0226723	22	1.00192	0.0127897	21
58	1.06276	0.0231804	22	1.00423	0.0129056	21
60	1.06623	0.0224931	22	1.00478	0.0125859	21
