# Supplementary material for: Complex effects of kinase localization revealed by compartment-specific regulation of protein kinase A activity
Source: eLife. 2022 Feb 24;11:e66869. doi: 10.7554/eLife.66869 (PMC8871369; doi:10.7554/eLife.66869)
Supplement: Figure 3—source data 1. — (a) Sheet 1, Figure 3C and Figure 3—figure supplement 1 Time Course. Normalized nuclear position data for cells in 20 nM rapamycin gradient (0.08 nM/µm) with or without the membrane subunit of the regulatory subunit of the protein kinase A (PKA-R) translocation system (Lyn-FRB). Results also shown for cells in a volume equivalent DMSO gradient, as displayed in Figure 3—figure supplement 1. Mean, standard error of the mean (SEM), and number of cells given for each time point and condition. (b) Sheet 2, Figure 3G Intracellular PKA Activity Distribution. Mean intracellular PM PKA activity along the cell length from the high end of the rapamycin gradient (‘0’) to the low end (‘1’) for three time points. Mean, SEM, and number of cells given for all 20 bins and each time point. [file elife-66869-fig3-data1.xlsx]

## Sheet: Fig 3C and Fig 3 - Fig Supp 1
	20 nM rapamycin						0.1% DMSO
	No Lyn-FRB			Lyn-FRB			Lyn-FRB
Time (min)	Mean	SEM	N	Mean	SEM	N	Mean	SEM	N
-10	-2.31998	0.719379	14	-1.23139	0.68785	12	0.646118	0.917234	18
-5	-1.2901	0.345174	14	-0.609623	0.388429	12	0.273117	0.536459	18
0	0	0	14	0	0	12	0	0	18
5	1.18138	0.361248	14	0.856232	0.29098	12	-0.567722	0.499873	18
10	2.28685	0.743787	14	1.8525	0.513324	12	-0.924502	0.822732	18
15	2.96558	1.11891	14	2.37101	1.05404	12	-0.576336	1.13922	18
20	3.28186	1.41243	14	2.80058	1.70289	12	0.00551032	1.41573	18
25	3.57082	1.65006	14	2.93958	2.2142	12	0.947235	1.73517	18
30	3.84537	1.82576	14	2.85292	2.62132	12	2.04368	2.11174	18
35	4.1694	2.01537	14	2.66536	3.14847	12	3.41666	2.74536	18
40	4.47966	2.29791	14	2.02353	3.76707	12	4.3734	3.21787	18
45	4.94854	2.67312	14	1.87418	4.26556	12	5.29461	3.58187	18
50	5.08404	2.84077	14	1.15995	4.66489	12	6.20429	3.93865	18
55	5.35062	3.02536	14	0.321719	5.29107	12	6.54349	4.26752	18
60	5.51724	3.12556	14	-0.526115	5.54579	12	6.92594	4.72694	18
65	5.93651	3.24603	14	-2.49866	5.95647	12	7.52148	5.0314	18
70	6.32938	3.24205	14	-2.98147	6.29447	12	7.90012	5.23936	18
75	6.75317	3.3632	14	-3.65457	6.68176	12	7.85073	5.45552	18
80	6.95303	3.5028	14	-5.21946	7.56787	12	7.79515	5.4831	18
85	7.80312	3.68469	14	-5.75165	7.79729	12	7.68975	5.38761	18
90	7.73106	3.76937	14	-7.10994	7.93465	12	6.81564	5.16297	18
95	8.20638	3.87291	14	-9.16279	8.42998	12	6.42814	5.11094	18
100	8.89096	3.98961	14	-11.5757	8.71361	12	6.35386	5.14442	18
105	9.63944	4.17407	14	-14.0595	8.74176	12	5.90375	5.02337	18
110	9.87069	4.28581	14	-16.3171	8.72473	12	5.60822	5.05877	18
115	10.1351	4.49897	14	-18.4456	8.56602	12	5.68066	5.15716	18
120	10.2115	4.61609	14	-20.5674	8.46832	12	6.05434	5.18821	18
125	10.5306	4.76774	14	-23.2481	8.47651	12	6.44316	5.47758	18
130	10.4601	4.90675	14	-27.2259	8.47982	12	6.54221	5.80852	18
135	11.0349	5.01304	14	-29.8751	8.3032	12	6.83678	6.08532	18
140	11.9018	5.14248	14	-30.7379	8.0733	12	6.69106	6.42678	18
145	12.584	5.33083	14	-32.0057	7.77366	12	6.47626	6.62488	18
150	13.1927	5.51532	14	-33.4528	7.47269	12	6.2605	6.79016	18
155	14.1231	5.70475	14	-34.8109	7.51623	12	5.99934	6.922	18
160	14.632	5.89945	14	-36.8581	7.66464	12	5.67209	6.94731	18
165	15.3731	6.15121	14	-38.057	7.85062	12	5.03857	6.87767	18
170	16.1646	6.35672	14	-38.9687	7.95393	12	4.59	6.88632	18
175	16.7931	6.56003	14	-39.7636	8.12428	12	4.04504	6.9406	18
180	17.5632	6.83717	14	-41.1431	8.47664	12	3.71965	7.00793	18
185	18.1636	6.99251	14	-41.8489	8.79255	12	3.26139	7.10715	18
190	18.4476	7.14059	14	-42.6456	9.21316	12	3.17059	7.39132	18

## Sheet: Fig 3G
	30 min			60 min			90 min
Normalized cell length	Mean	SEM	N	Mean	SEM	N	Mean	SEM	N
0	0.94485	0.0139149	9	0.933447	0.0236959	9	0.932064	0.0240394	9
0.0526316	0.962032	0.00992875	9	0.967429	0.0213586	9	0.954336	0.0233947	9
0.105263	0.976519	0.00657626	9	0.966739	0.0219364	9	0.962659	0.0259338	9
0.157895	0.98855	0.0115371	9	0.968655	0.0232824	9	0.957665	0.0346331	9
0.210526	1.00452	0.0176677	9	0.978484	0.0288123	9	0.962659	0.0410837	9
0.263158	1.01178	0.0179508	9	0.979141	0.0266904	9	0.950797	0.0375177	9
0.315789	1.00511	0.0182058	9	0.982918	0.0260078	9	0.947595	0.0348926	9
0.368421	1.00747	0.0154066	9	0.982713	0.0219147	9	0.953892	0.0297509	9
0.421053	1.00686	0.0171018	9	0.984618	0.0209982	9	0.973137	0.0233619	9
0.473684	1.01281	0.0179378	9	0.98519	0.0210289	9	0.994187	0.0150516	9
0.526316	1.02317	0.0158411	9	0.993403	0.0149536	9	1.01083	0.0228927	9
0.578947	1.03017	0.0183798	9	1.01145	0.0199263	9	1.02825	0.032349	9
0.631579	1.03002	0.0170643	9	1.02266	0.0210674	9	1.04009	0.0337495	9
0.684211	1.01291	0.0190826	9	1.02443	0.0320516	9	1.03806	0.0352652	9
0.736842	1.02731	0.0243768	9	1.05368	0.0420925	9	1.06217	0.0428599	9
0.789474	1.04763	0.0263427	9	1.07535	0.0506188	9	1.08923	0.0512042	9
0.842105	1.04487	0.0308564	9	1.08144	0.0521582	9	1.10896	0.0547772	9
0.894737	1.03334	0.0321234	9	1.08412	0.0406415	9	1.09981	0.0487612	9
0.947368	1.01753	0.0363536	9	1.06614	0.0409136	9	1.0784	0.0483426	9
1	0.999573	0.0364305	9	1.0257	0.0416875	9	1.03444	0.0553721	9
