# Supplementary material for: Complex effects of kinase localization revealed by compartment-specific regulation of protein kinase A activity
Source: eLife. 2022 Feb 24;11:e66869. doi: 10.7554/eLife.66869 (PMC8871369; doi:10.7554/eLife.66869)
Supplement: Figure 4—source data 1. — Figure 4 Time Courses. Normalized nuclear position data for cells exposed to rapamycin distributions of varied magnitudes, slopes, and orientations. Mean, standard error of the mean (SEM), and number of cells given for each time point and condition. [file elife-66869-fig4-data1.xlsx]

## Sheet: Fig 4
	Uniform Stimulus						Graded Stimulus
	20 nM rapamycin			100 nM rapamycin			Shallow (0.04 nM/µm)			Steep, Forward (0.08 nM/µm)			Steep, Reverse (0.08 nM/µm)
Time (min)	Mean	SEM	N	Mean	SEM	N	Mean	SEM	N	Mean	SEM	N	Mean	SEM	N
-10	-1.41768	0.359197	23	0.635779	0.905196	14	-2.62103	0.446592	51	-1.23139	0.68785	12	-2.41824	0.429047	43
-5	-0.685062	0.174033	23	0.217693	0.436319	14	-1.30933	0.249319	51	-0.609623	0.388429	12	-1.33417	0.214786	43
0	0	0	23	0	0	14	0	0	51	0	0	12	0	0	43
5	0.671549	0.171181	23	0.068168	0.518936	14	1.02717	0.221949	51	0.856232	0.29098	12	1.34914	0.240077	43
10	1.77307	0.410273	23	0.487496	0.899505	14	2.4223	0.478968	51	1.8525	0.513324	12	2.85845	0.463559	43
15	3.07789	0.686853	23	1.584	1.2163	14	3.99199	0.758383	51	2.37101	1.05404	12	3.6573	0.651344	43
20	3.91919	0.98722	23	3.17232	1.49227	14	4.54141	0.91827	51	2.80058	1.70289	12	4.02064	0.844306	43
25	4.89082	1.18222	23	4.81347	1.87918	14	4.38466	1.06045	51	2.93958	2.2142	12	4.12147	1.04254	43
30	5.44547	1.44172	23	6.75672	2.19205	14	3.99454	1.25243	51	2.85292	2.62132	12	4.01034	1.23386	43
35	6.16925	1.61955	23	8.06797	2.40504	14	3.65544	1.44464	51	2.66536	3.14847	12	3.7456	1.38959	43
40	6.72015	1.83877	23	9.24194	2.67375	14	3.64898	1.59073	51	2.02353	3.76707	12	3.75542	1.55242	43
45	7.27378	2.02453	23	10.3046	3.08488	14	3.57765	1.67417	51	1.87418	4.26556	12	3.82424	1.73061	43
50	7.82941	2.21248	23	11.0448	3.47524	14	3.66843	1.79298	51	1.15995	4.66489	12	3.81982	1.9084	43
55	8.3526	2.41613	23	11.6548	3.77665	14	3.31911	1.97288	51	0.321719	5.29107	12	3.95372	2.09831	43
60	8.85333	2.65123	23	12.2484	4.04908	14	2.76703	2.15535	51	-0.526115	5.54579	12	4.10471	2.27134	43
65	9.09555	2.83897	23	12.7143	4.36905	14	2.1854	2.39006	51	-2.49866	5.95647	12	4.52183	2.4193	43
70	9.48247	3.05157	23	13.3117	4.6854	14	1.99239	2.56659	51	-2.98147	6.29447	12	5.08838	2.56949	43
75	9.61781	3.34335	23	13.6965	5.01266	14	1.77564	2.7149	51	-3.65457	6.68176	12	5.80671	2.69197	43
80	9.94082	3.56752	23	14.2728	5.21201	14	1.52134	2.90017	51	-5.21946	7.56787	12	6.41421	2.83903	43
85	10.1533	3.82625	23	14.8365	5.39297	14	1.4465	3.07796	51	-5.75165	7.79729	12	6.8004	3.008	43
90	10.4988	4.07279	23	14.9081	5.51664	14	1.39225	3.23777	51	-7.10994	7.93465	12	7.31971	3.17677	43
95	10.7785	4.31214	23	14.7904	5.83602	14	1.48438	3.34814	51	-9.16279	8.42998	12	7.80656	3.35365	43
100	11.0667	4.53878	23	14.4343	6.13096	14	1.21129	3.43652	51	-11.5757	8.71361	12	8.34035	3.49625	43
105	11.4121	4.78211	23	13.8926	6.35131	14	1.11326	3.52081	51	-14.0595	8.74176	12	8.9755	3.62672	43
110	12.3126	4.98539	23	13.2207	6.50596	14	1.00258	3.65162	51	-16.3171	8.72473	12	9.65986	3.76197	43
115	13.1395	5.10715	23	12.6422	6.72187	14	0.975437	3.80535	51	-18.4456	8.56602	12	10.5437	3.92495	43
120	13.9532	5.09675	23	12.3619	6.90799	14	0.779054	3.92936	51	-20.5674	8.46832	12	11.4397	4.08008	43
125	14.6473	5.11703	23	11.7939	7.10462	14	0.60675	4.03695	51	-23.2481	8.47651	12	12.31	4.20881	43
130	15.1628	5.13179	23	11.6417	7.30155	14	0.682247	4.14924	51	-27.2259	8.47982	12	13.1007	4.36951	43
135	15.9159	5.04981	23	11.1856	7.53979	14	0.43778	4.34325	51	-29.8751	8.3032	12	13.4019	4.57702	43
140	16.631	5.08853	23	11.2408	7.7975	14	0.171915	4.54625	51	-30.7379	8.0733	12	13.9726	4.76674	43
145	17.2546	5.13113	23	10.7046	7.91843	14	0.0450088	4.73955	51	-32.0057	7.77366	12	14.5055	4.94626	43
150	17.9188	5.23286	23	9.93349	8.0374	14	0.164541	4.87689	51	-33.4528	7.47269	12	15.0776	5.14637	43
155	18.6136	5.49646	23	9.67695	8.24	14	0.638848	4.93683	51	-34.8109	7.51623	12	15.4648	5.31273	43
160	19.1952	5.72746	23	9.5891	8.47376	14	1.19575	5.00725	51	-36.8581	7.66464	12	16.0214	5.50076	43
165	19.9136	5.97138	23	9.13587	8.68215	14	1.40266	5.08616	51	-38.057	7.85062	12	16.5331	5.67083	43
170	20.5559	6.18723	23	8.98502	8.89405	14	1.57854	5.15685	51	-38.9687	7.95393	12	16.9935	5.83685	43
175	21.5421	6.37677	23	8.99978	9.04202	14	1.80878	5.19896	51	-39.7636	8.12428	12	17.4086	6.00821	43
180	22.3544	6.46782	23	9.09942	9.26527	14	2.07044	5.2499	51	-41.1431	8.47664	12	17.9551	6.21157	43
185	23.0878	6.52625	23	9.00739	9.43494	14	2.30993	5.34957	51	-41.8489	8.79255	12
190	23.7367	6.61465	23	8.77119	9.66973	14	2.63771	5.43757	51	-42.6456	9.21316	12
195	24.3167	6.75319	23	8.54263	9.86749	14
200	24.7614	6.95023	23	8.42185	9.978	14
205	25.2272	7.08103	23	7.87351	10.046	14
210	25.9028	7.22025	23	7.45148	10.1621	14
215	26.6611	7.36701	23	7.12631	10.3591	14
